# Supplementary material
Source: Springer Nature journal article supplement (https://www.springermedizin.de/resource/supplementary/12889_2010_2831_MOESM2_ESM.pdf/9487524)

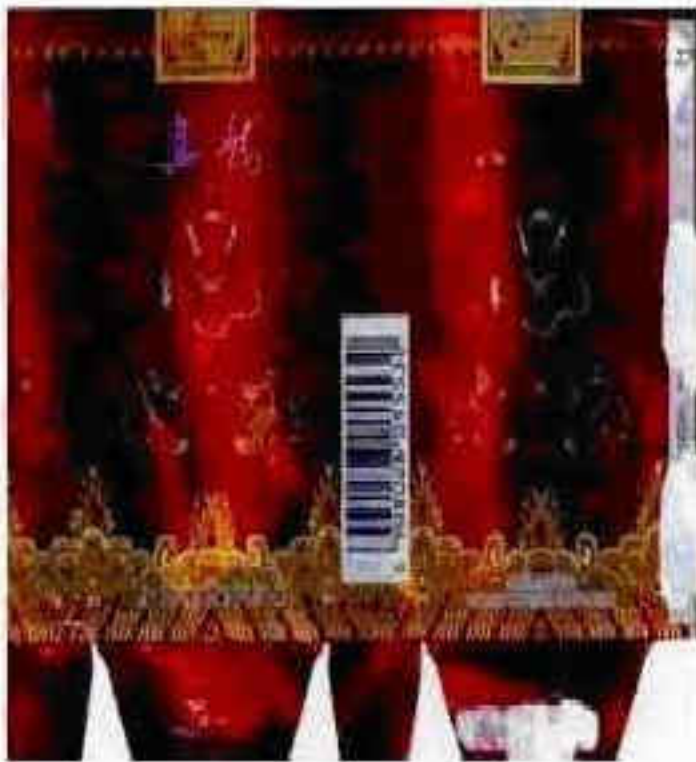

Label A

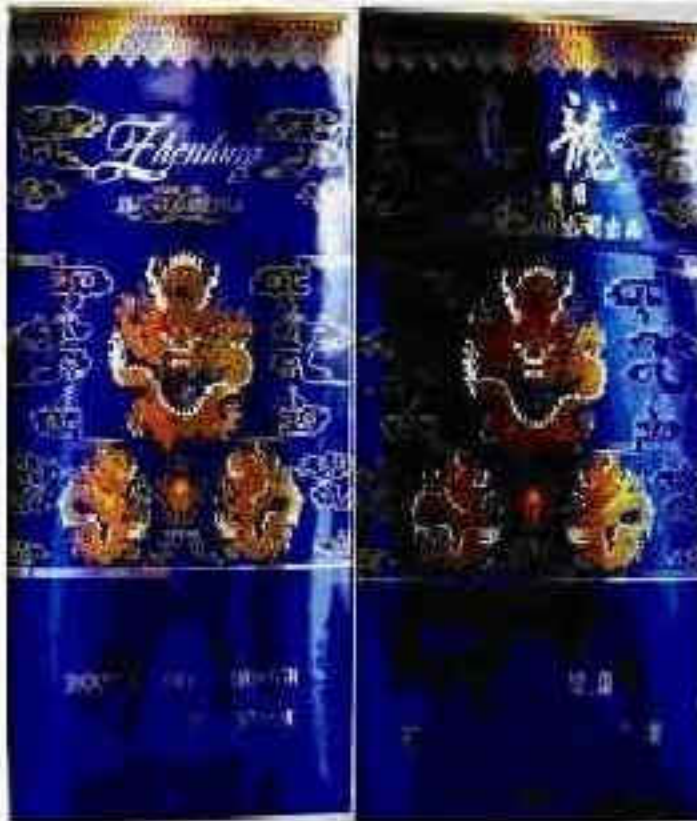

Label B

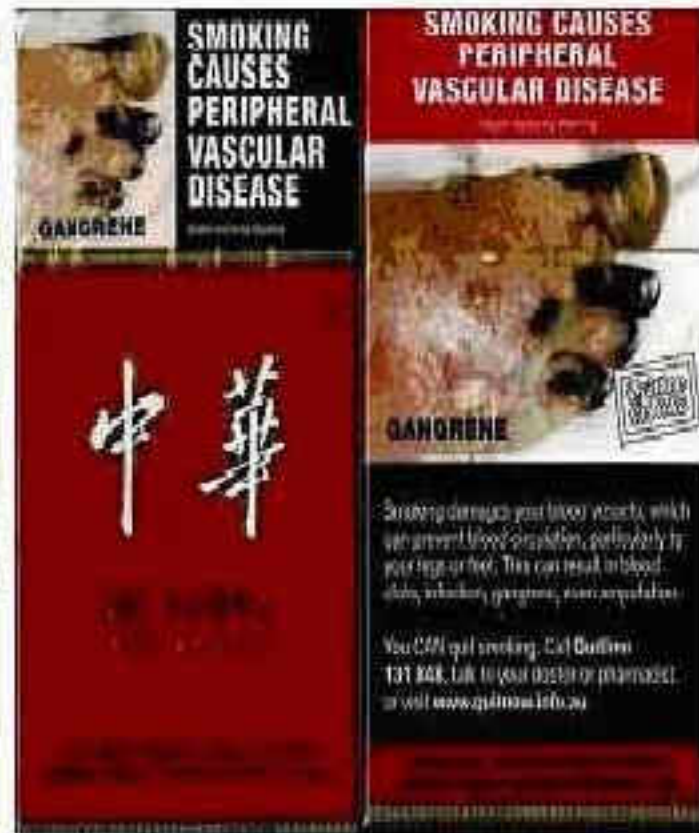

Label C

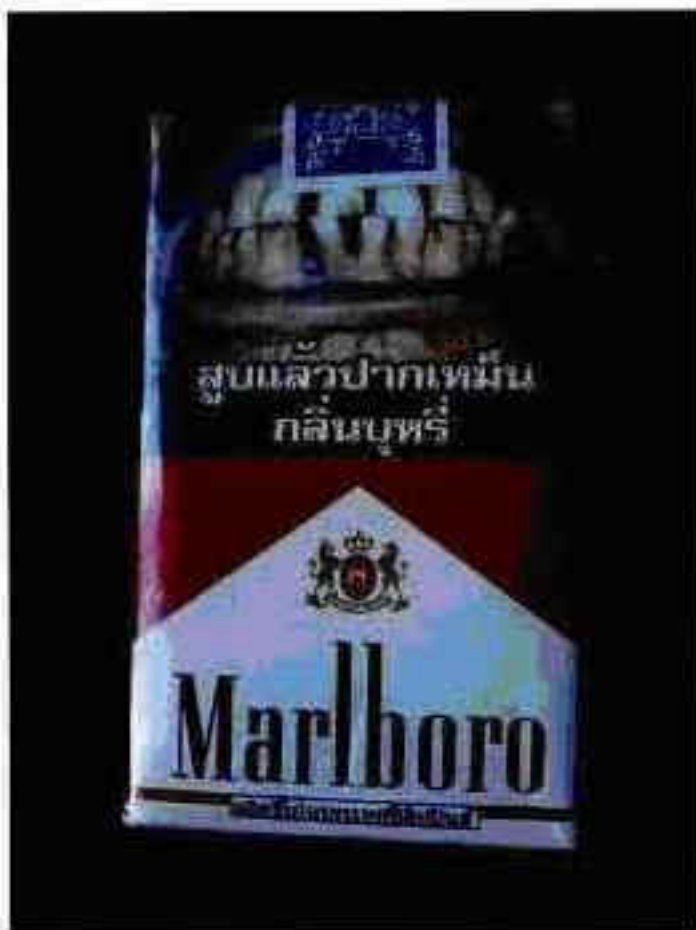

Label D

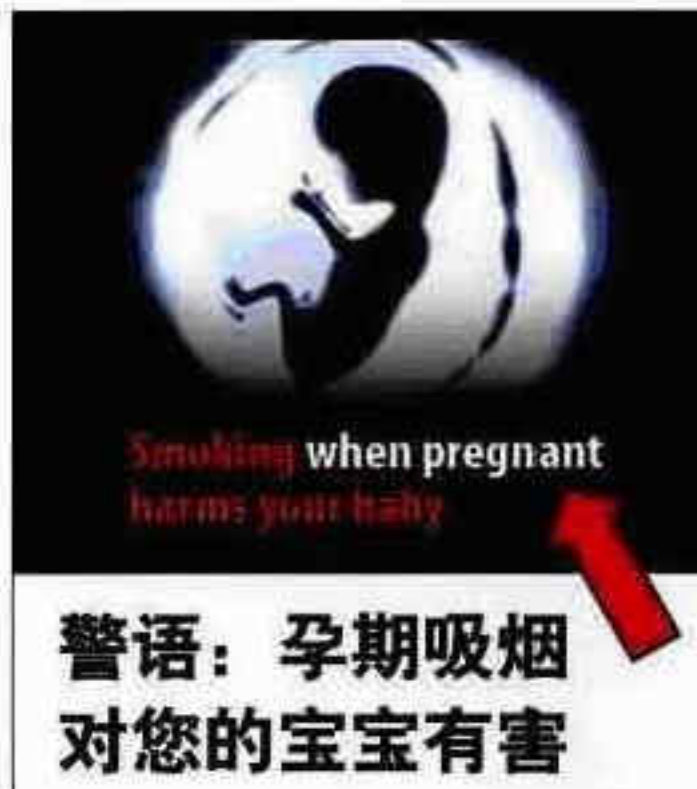

Label E

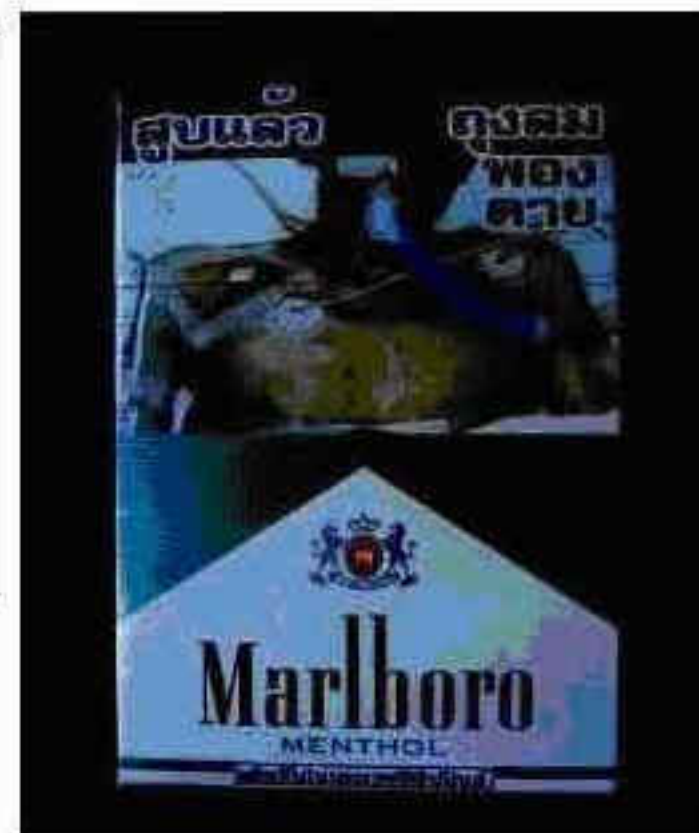

Label F

Supplement: MOESM2 [file 9487524]
